# Supplementary material
Source: PubMed Central journal article supplement (PMC3019281)
Supplement: NIHMS256681-supplement-01.pdf [file NIHMS256681-supplement-01.pdf]

## INVENTORY OF SUPPLEMENTAL MATERIAL

### Supplemental Data

**Supplementary Figure 1** Comparison of H3K4 methyllysine-specific antibodies for different methylation states- mentioned in Fig 2.

**Supplementary Figure 2.** Effect of neighboring acetylation on BPTF binding – mentioned in Fig 4.

**Supplementary Figure 3.** Heat map of all experimental antibody data – associated with Fig 2. and Fig. 3.

**Supplementary Figure 4.** Scatter plots comparing two arrays for Rag2, BPTF, and CHD1 – mentioned in Fig. 4

### Supplemental Methods

Table S1 – Table of antibodies used

Table S2 – Table of peptides synthesized

Table S3 – Layout of peptide array

Table S4 – Summary of assay conditions for all antibodies tested

Additionally: All experimental datasets and full characterization for all reagents synthesized are available from our website

(<http://www.med.unc.edu/~bstrahl/Arrays/index.htm>)

## Supplementary Figure 1

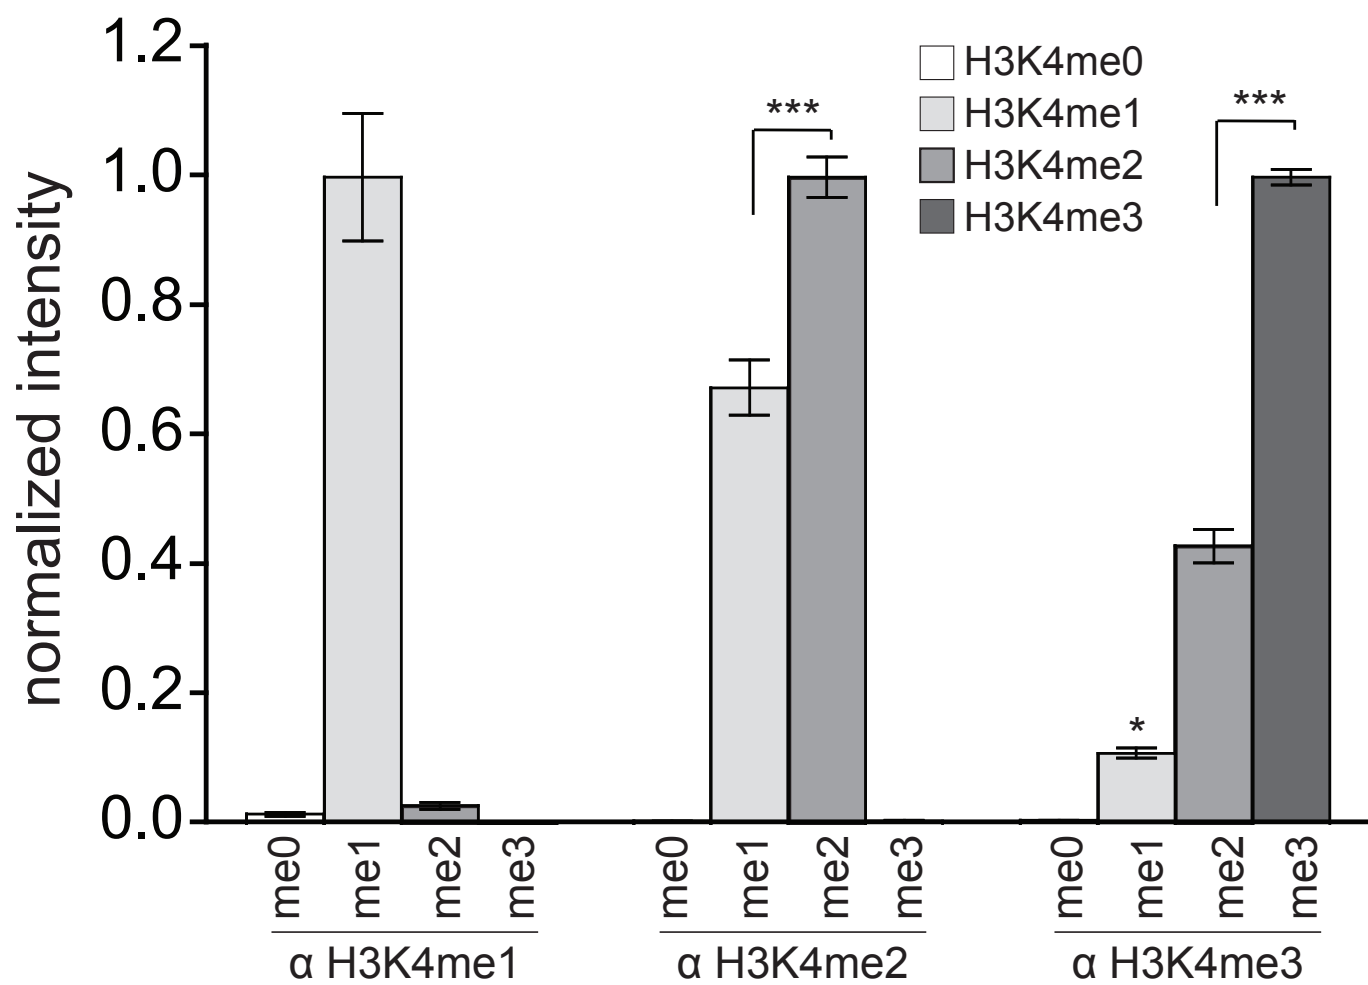

### Supplementary Figure 2

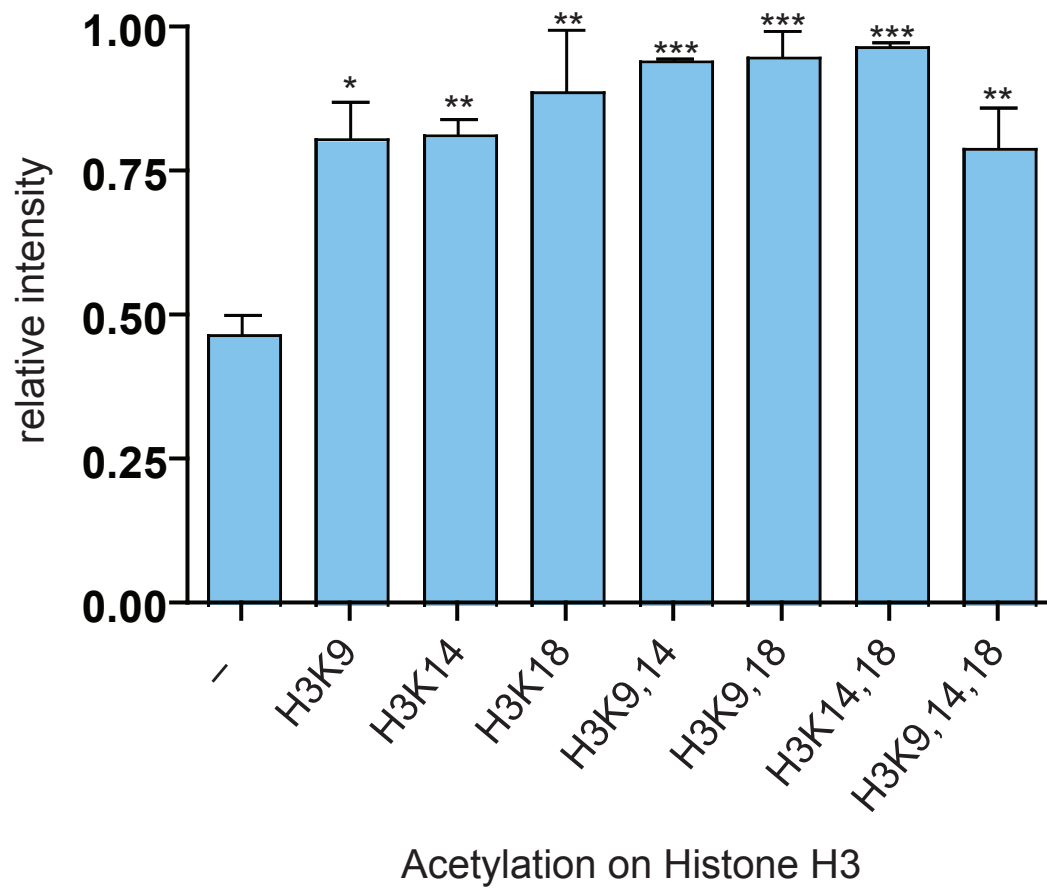

Supplementary Figure 3

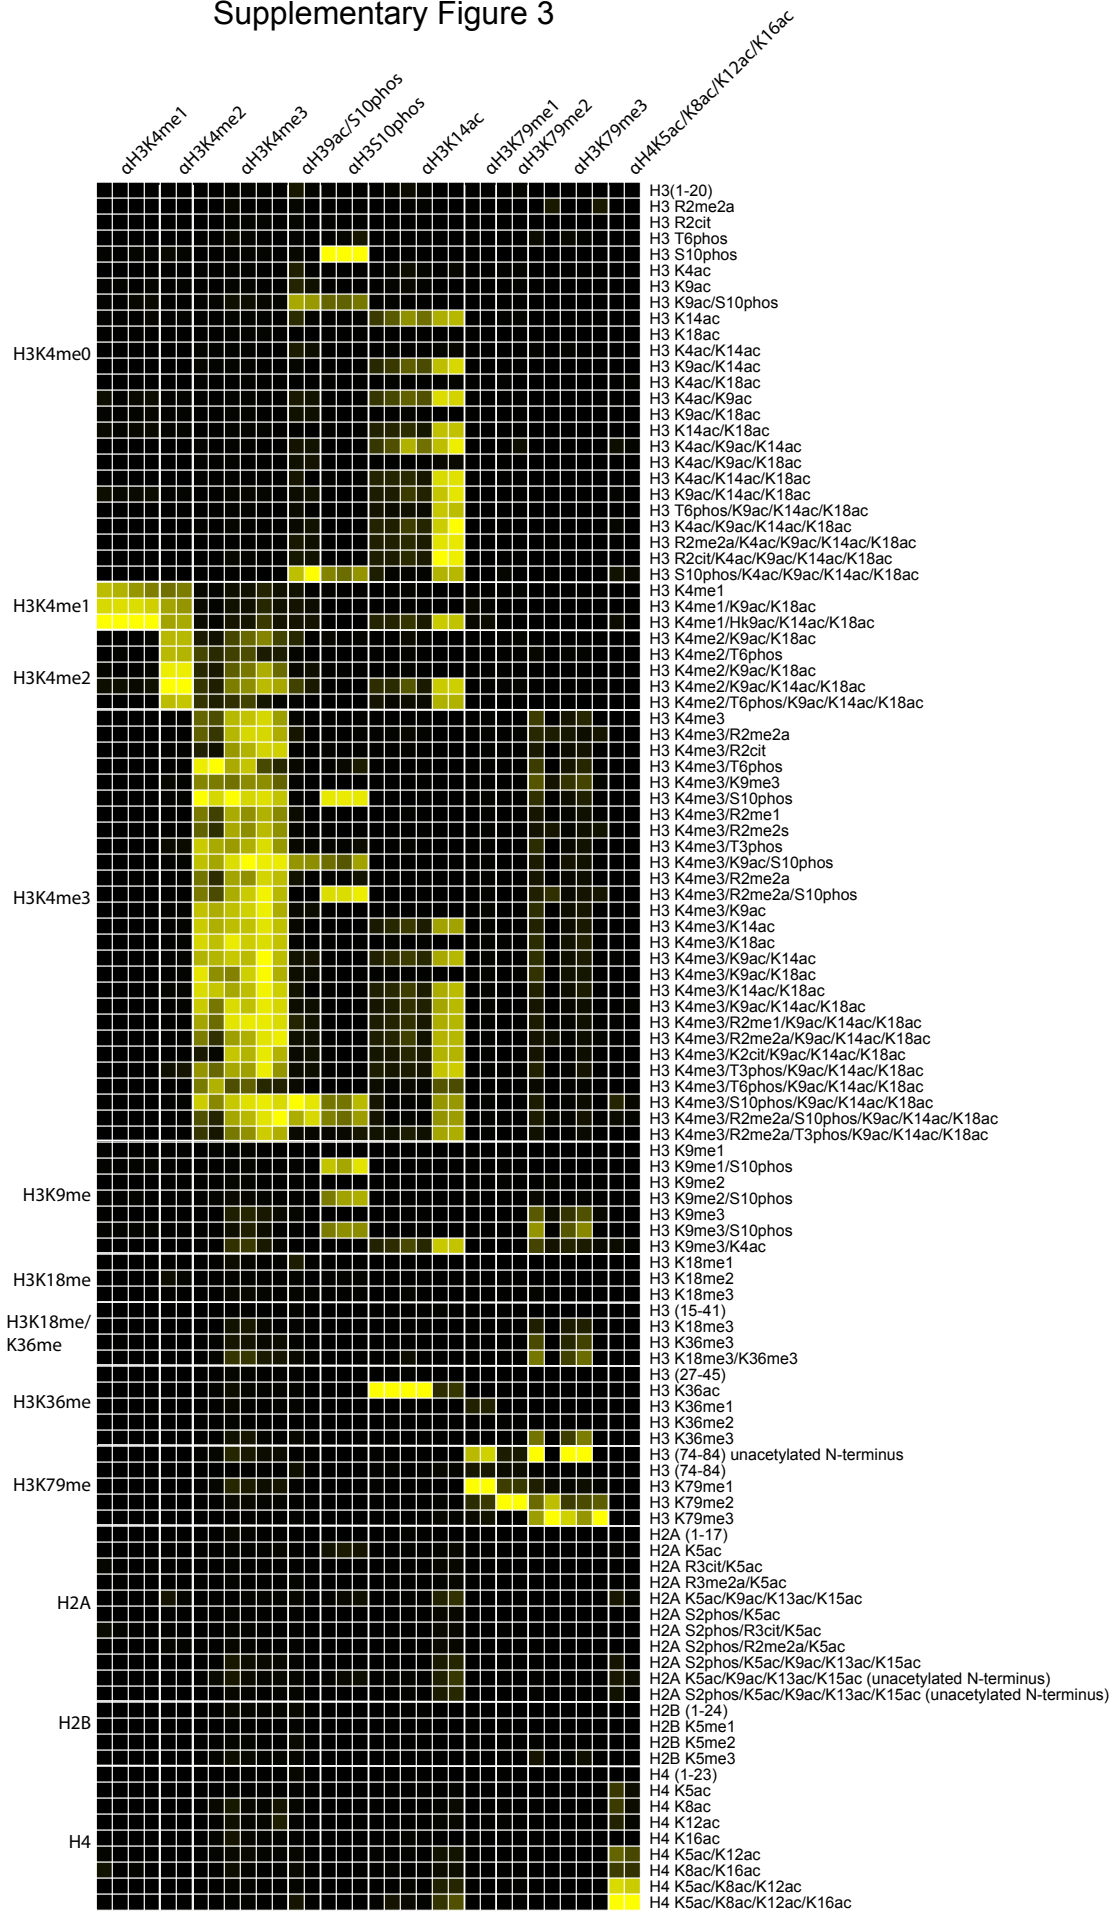

## Supplementary Figure 4

a

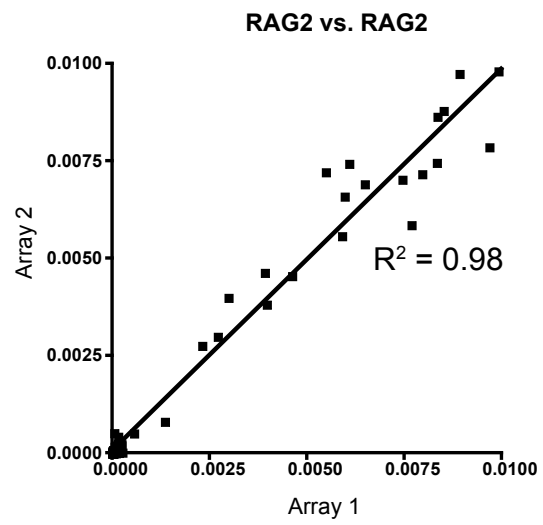

b

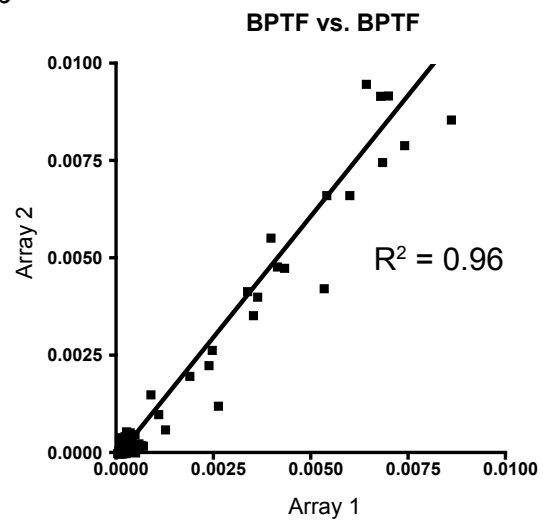

c

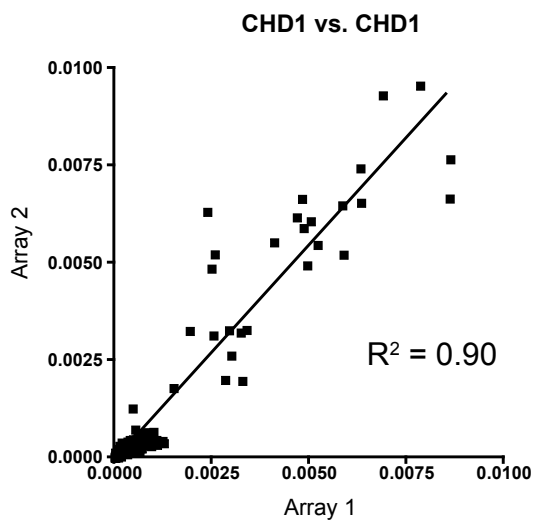

**Supplementary Table I: List of Antibodies and Sources**

| <b>Modification</b> | <b>Antibody</b> | <b>Source</b> | <b>Supplier</b> | <b>Catalog</b> | <b>Lot</b>  |
|---------------------|-----------------|---------------|-----------------|----------------|-------------|
| H3K4me1             | polyclonal      | rabbit        | upstate         | 07-436         | 30218       |
|                     | polyclonal      | rabbit        | millipore       | 07-436         | DAM1687548  |
| H3K4me2             | polyclonal      | rabbit        | active motif    | 39142          | 168         |
| H3K4me3             | polyclonal      | rabbit        | active motif    | 39160          | 1609004     |
|                     | polyclonal      | rabbit        | millipore       | 07-473         | DAM1623866  |
|                     | monoclonal      | mouse         | abcam           | ab1012         | 761207      |
| H3K14ac             | polyclonal      | rabbit        | active motif    | 39616          | 11709001    |
|                     | polyclonal      | rabbit        | millipore       | 07-353         | DAM1548623  |
|                     | polyclonal      | rabbit        | abcam           | ab46984        | 730270      |
| H3S10phos           | polyclonal      | rabbit        | active motif    | 39253          | 8308001     |
| H3K9acS10phos       | polyclonal      | rabbit        | cell signaling  | 9711           | ref 10/2008 |
| H3K79me1            | polyclonal      | rabbit        | active motif    | 39146          | 172         |
| H3K79me2            | monoclonal      | rabbit        | milipore        | 04-835         | DAM1527889  |
| H3K79me3            | polyclonal      | rabbit        | abcam           | ab2621         | 809870      |
|                     | polyclonal      | rabbit        | abcam           | ab2621         | 441039      |
| H4tetraacetyl       | polyclonal      | rabbit        | active motif    | 39179          | 1008001     |

**Supplementary Table 2: List of Peptide Sequences and Identifying Number<sup>1</sup>**

| Peptide # | Sequence                                                                                       |
|-----------|------------------------------------------------------------------------------------------------|
|           | <b>H3 [1-20]</b>                                                                               |
| 1         | ARTKQTARKSTGGKAPRKQL-K(Biot)-NH <sub>2</sub>                                                   |
| 2         | ARTKQTARKSTGGK(Ac)APRKQL-K(Biot)-NH <sub>2</sub>                                               |
| 3         | ARTKQTARK(Ac)STGGKAPRKQL-K(Biot)-NH <sub>2</sub>                                               |
| 4         | ARTK(Ac)QTARKSTGGKAPRKQL-K(Biot)-NH <sub>2</sub>                                               |
| 5         | ARTK(Ac)QTARKSTGGK(Ac)APRKQL-K(Biot)-NH <sub>2</sub>                                           |
| 6         | ARTKQTARK(Ac)STGGK(Ac)APRKQL-K(Biot)-NH <sub>2</sub>                                           |
| 7         | ARTK(Ac)QTARK(Ac)STGGKAPRKQL-K(Biot)-NH <sub>2</sub>                                           |
| 8         | ARTK(Ac)QTARK(Ac)STGGK(Ac)APRKQL-K(Biot)-NH <sub>2</sub>                                       |
| 10        | ARTKQTARKSTGGKAPRK(Ac)QL-K(Biot)-NH <sub>2</sub>                                               |
| 11        | ARTKQTARKSTGGK(Ac)APRK(Ac)QL-K(Biot)-NH <sub>2</sub>                                           |
| 12        | ARTKQTARK(Ac)STGGKAPRK(Ac)QL-K(Biot)-NH <sub>2</sub>                                           |
| 13        | ARTK(Ac)QTARKSTGGKAPRK(Ac)QL-K(Biot)-NH <sub>2</sub>                                           |
| 14        | ARTKQTARK(Ac)STGGK(Ac)APRK(Ac)QL-K(Biot)-NH <sub>2</sub>                                       |
| 15        | ARTK(Ac)QTARKSTGGK(Ac)APRK(Ac)QL-K(Biot)-NH <sub>2</sub>                                       |
| 16        | ARTK(Ac)QTARK(Ac)STGGKAPRK(Ac)QL-K(Biot)-NH <sub>2</sub>                                       |
| 17        | ARTK(Ac)QTARK(Ac)STGGK(Ac)APRK(Ac)QL-K(Biot)-NH <sub>2</sub>                                   |
| 18        | ARTK(Me <sub>3</sub> )QTARKSTGGKAPRKQL-K(Biot)-NH <sub>2</sub>                                 |
| 19        | ARTK(Me <sub>3</sub> )QTARK(Ac)STGGKAPRKQL-K(Biot)-NH <sub>2</sub>                             |
| 20        | ARTK(Me <sub>3</sub> )QTARKSTGGK(Ac)APRKQL-K(Biot)-NH <sub>2</sub>                             |
| 21        | ARTK(Me <sub>3</sub> )QTARKSTGGKAPRK(Ac)QL-K(Biot)-NH <sub>2</sub>                             |
| 22        | ARTK(Me <sub>3</sub> )QTARK(Ac)STGGK(Ac)APRKQL-K(Biot)-NH <sub>2</sub>                         |
| 23        | ARTK(Me <sub>3</sub> )QTARK(Ac)STGGKAPRK(Ac)QL-K(Biot)-NH <sub>2</sub>                         |
| 24        | ARTK(Me <sub>3</sub> )QTARKSTGGK(Ac)APRK(Ac)QL-K(Biot)-NH <sub>2</sub>                         |
| 25        | ARTK(Me <sub>3</sub> )QTARK(Ac)STGGK(Ac)APRK(Ac)QL-K(Biot)-NH <sub>2</sub>                     |
| 26        | ARpTK(Me <sub>3</sub> )QTARK(Ac)STGGK(Ac)APRK(Ac)QL-K(Biot)-NH <sub>2</sub>                    |
| 27        | ARpTK(Me <sub>3</sub> )QTARKSTGGKAPRKQL-K(Biot)-NH <sub>2</sub>                                |
| 28        | AR(Me <sub>2</sub> a)pTK(Me <sub>3</sub> )QTARK(Ac)STGGK(Ac)APRK(Ac)QL-K(Biot)-NH <sub>2</sub> |
| 29        | AR(Me <sub>2</sub> a)pTK(Me <sub>3</sub> )QTARKSTGGKAPRKQL-K(Biot)-NH <sub>2</sub>             |
| 30        | AR(Me <sub>2</sub> a)TK(Me <sub>3</sub> )QTARKSTGGKAPRKQL-K(Biot)-NH <sub>2</sub>              |
| 31        | 5-Fam-ARTKQTARKSTGGKAPRKQL-K(Biot)-NH <sub>2</sub>                                             |
| 32        | ARTK(Me <sub>2</sub> )QTARKSTGGKAPRKQL-K(Biot)-NH <sub>2</sub>                                 |
| 33        | ARTK(Me <sub>2</sub> )QTARK(Ac)STGGK(Ac)APRK(Ac)QL-K(Biot)-NH <sub>2</sub>                     |
| 34        | ARTK(Me)QTARKSTGGKAPRKQL-K(Biot)-NH <sub>2</sub>                                               |
| 35        | ARTK(Me)QTARK(Ac)STGGK(Ac)APRK(Ac)QL-K(Biot)-NH <sub>2</sub>                                   |
| 36        | ARTKQTARKpSTGGKAPRKQL-K(Biot)-NH <sub>2</sub>                                                  |
| 37        | ARTK(Ac)QTARK(Ac)pSTGGK(Ac)APRK(Ac)QL-K(Biot)-NH <sub>2</sub>                                  |
| 38        | ARTK(Me <sub>3</sub> )QTARKpSTGGKAPRKQL-K(Biot)-NH <sub>2</sub>                                |
| 39        | ARTK(Me <sub>3</sub> )QTARK(Ac)pSTGGK(Ac)APRK(Ac)QL-K(Biot)-NH <sub>2</sub>                    |
| 40        | AR(Me <sub>2</sub> a)TK(Me <sub>3</sub> )QTARKpSTGGKAPRKQL-K(Biot)-NH <sub>2</sub>             |
| 41        | AR(Me <sub>2</sub> a)TK(Me <sub>3</sub> )QTARK(Ac)pSTGGK(Ac)APRK(Ac)QL-K(Biot)-NH <sub>2</sub> |
| 42        | ARTKQTARK(Me <sub>3</sub> )STGGKAPRKQL-K(Biot)-NH <sub>2</sub>                                 |
| 43        | ARTK(Ac)QTARK(Me <sub>3</sub> )STGGK(Ac)APRK(Ac)QL-K(Biot)-NH <sub>2</sub>                     |
| 44        | ARTK(Me <sub>2</sub> )QTARK(Ac)STGGKAPRK(Ac)QL-K(Biot)-NH <sub>2</sub>                         |

|     |                                                                                                                                      |
|-----|--------------------------------------------------------------------------------------------------------------------------------------|
| 45  | ARTK(Me)QTARK(Ac)STGGKAPRK(Ac)QL-K(Biot)-NH <sub>2</sub>                                                                             |
| 47  | AR(Me <sub>2</sub> a)TKQTARKSSTGGKAPRKQL-K(Biot)-NH <sub>2</sub>                                                                     |
| 48  | AR(Me <sub>2</sub> a)TK(Ac)QTARK(Ac)STGGK(Ac)APRK(Ac)QL-K(Biot)-NH <sub>2</sub>                                                      |
| 50  | AR(Me <sub>2</sub> a)TK(Me <sub>3</sub> )QTARK(Ac)STGGK(Ac)APRK(Ac)QL-K(Biot)-NH <sub>2</sub>                                        |
| 51  | AR(Me)TK(Me <sub>3</sub> )QTARKSSTGGKAPRKQL-K(Biot)-NH <sub>2</sub>                                                                  |
| 52  | AR(Me)TK(Me <sub>3</sub> )QTARK(Ac)STGGK(Ac)APRK(Ac)QL-K(Biot)-NH <sub>2</sub>                                                       |
| 53  | ACitTKQTARKSSTGGKAPRKQL-K(Biot)-NH <sub>2</sub>                                                                                      |
| 54  | ACitTK(Me <sub>3</sub> )QTARKSSTGGKAPRKQL-K(Biot)-NH <sub>2</sub>                                                                    |
| 55  | ACitTK(Me <sub>3</sub> )QTARK(Ac)STGGK(Ac)APRK(Ac)QL-K(Biot)-NH <sub>2</sub>                                                         |
| 56  | ACitTK(Ac)QTARK(Ac)STGGK(Ac)APRK(Ac)QL-K(Biot)-NH <sub>2</sub>                                                                       |
|     | <b>H4 [1-23]</b>                                                                                                                     |
| 58  | Ac-SGRGKGGKGLGKGGAKRHRKVLR-Peg-Biot                                                                                                  |
| 59  | Ac-SGRGK(Ac)GGK(Ac)GLGK(Ac)GGAK(Ac)RHRKVLR-Peg-Biot                                                                                  |
| 66  | Ac-SGRGK(Ac)GGKGLGKGGAKRHRKVLR-Peg-Biot                                                                                              |
| 67  | Ac-SGRGKGGK(Ac)GLGKGGAKRHRKVLR-Peg-Biot                                                                                              |
| 68  | Ac-SGRGKGGKGLGK(Ac)GGAKRHRKVLR-Peg-Biot                                                                                              |
| 69  | Ac-SGRGKGGKGLGKGGAK(Ac)RHRKVLR-Peg-Biot                                                                                              |
| 70  | Ac-SGRGK(Ac)GGKGLGK(Ac)GGAKRHRKVLR-Peg-Biot                                                                                          |
| 71  | Ac-SGRGKGGK(Ac)GLGKGGAK(Ac)RHRKVLR-Peg-Biot                                                                                          |
| 72  | Ac-SGRGK(Ac)GGK(Ac)GLGK(Ac)GGAKRHRKVLR-Peg-Biot                                                                                      |
|     | <b>H3 [15-41]</b>                                                                                                                    |
| 90  | Ac-APRK <sup>18</sup> QLATK <sup>23</sup> AARK <sup>27</sup> SAPSTGGVK <sup>36</sup> K <sup>37</sup> PHRY-GG-K(Biot)-NH <sub>2</sub> |
| 91  | Ac-APRK(Me <sub>3</sub> )QLATKAARKSAPSTGGVKKPHRY-GG-K(Biot)-NH <sub>2</sub>                                                          |
| 93  | Ac-APRKQLATKAARKSAPSTGGVK(Me <sub>3</sub> )KPHRY-GG-K(Biot)-NH <sub>2</sub>                                                          |
| 95  | Ac-APRK(Me <sub>3</sub> )QLATKAARKSAPSTGGVK(Me <sub>3</sub> )KPHRY-GG-K(Biot)-NH <sub>2</sub>                                        |
|     | <b>H3 [74-84]</b>                                                                                                                    |
| 100 | Ac-IAQDFK <sup>79</sup> TDLRF-Peg-K(Biot)-NH <sub>2</sub>                                                                            |
| 101 | Ac-IAQDFK(Me <sub>3</sub> )TDLRF-Peg-K(Biot)-NH <sub>2</sub>                                                                         |
| 102 | Ac-IAQDFK(Me <sub>2</sub> )TDLRF-Peg-K(Biot)-NH <sub>2</sub>                                                                         |
| 103 | Ac-IAQDFK(Me)TDLRF-Peg-K(Biot)-NH <sub>2</sub>                                                                                       |
| 104 | IAQDFKTDLRF-Peg-K(Biot)-NH <sub>2</sub>                                                                                              |
|     | <b>H3 [27-45]</b>                                                                                                                    |
| 120 | KSAPSTGGVK(Me <sub>3</sub> )KPHRYKPGT-G-K(Biot)-NH <sub>2</sub>                                                                      |
| 121 | KSAPSTGGVK(Me <sub>2</sub> )KPHRYKPGT-G-K(Biot)-NH <sub>2</sub>                                                                      |
| 122 | KSAPSTGGVK(Me)KPHRYKPGT-G-K(Biot)-NH <sub>2</sub>                                                                                    |
| 123 | KSAPSTGGVK(Ac)KPHRYKPGT-GG-K(Biot)-NH <sub>2</sub>                                                                                   |
| 124 | KSAPSTGGVK <sup>36</sup> K <sup>37</sup> PHRYKPGT-GG-K(Biot)-NH <sub>2</sub>                                                         |
|     | <b>H3 [1-20]</b>                                                                                                                     |
| 132 | ARTK(Me <sub>3</sub> )QTARK(Me <sub>3</sub> )STGGKAPRKQL-K(Biot)-NH <sub>2</sub>                                                     |
| 133 | ARTKQTARK(Me <sub>2</sub> )STGGKAPRKQL-K(Biot)-NH <sub>2</sub>                                                                       |
| 134 | ARTKQTARK(Me)STGGKAPRKQL-K(Biot)-NH <sub>2</sub>                                                                                     |
| 137 | ARTKQTARKSSTGGKAPRK(Me <sub>3</sub> )QL-K(Biot)-NH <sub>2</sub>                                                                      |
| 138 | ARTKQTARKSSTGGKAPRK(Me <sub>2</sub> )QL-K(Biot)-NH <sub>2</sub>                                                                      |
| 139 | ARTKQTARKSSTGGKAPRK(Me)QL-K(Biot)-NH <sub>2</sub>                                                                                    |
| 144 | ARTKQTARK(Ac)phSTGGKAPRKQL-K(Biot)-NH <sub>2</sub>                                                                                   |
| 145 | ARTKQTARK(Me <sub>3</sub> )phSTGGKAPRKQL-K(Biot)-NH <sub>2</sub>                                                                     |
| 146 | ARTKQTARK(Me <sub>2</sub> )phSTGGKAPRKQL-K(Biot)-NH <sub>2</sub>                                                                     |
| 147 | ARTKQTARK(Me)phSTGGKAPRKQL-K(Biot)-NH <sub>2</sub>                                                                                   |



|     |                                                                                         |
|-----|-----------------------------------------------------------------------------------------|
| 148 | ARTK(Me <sub>3</sub> )QTARK(Ac)phSTGGKAPRKQL-K(Biot)-NH <sub>2</sub>                    |
| 157 | AR(Me <sub>2</sub> s)TK(Me <sub>3</sub> )QTARKSSTGGKAPRKQL-K(Biot)-NH <sub>2</sub>      |
| 162 | ARTKQpTARKSSTGGKAPRKQL-K(Biot)-NH <sub>2</sub>                                          |
| 163 | ARTK(Me <sub>3</sub> )QpTARKSSTGGKAPRKQL-K(Biot)-NH <sub>2</sub>                        |
| 164 | ARTK(Me <sub>2</sub> )QpTARKSSTGGKAPRKQL-K(Biot)-NH <sub>2</sub>                        |
| 165 | ARTKQpTARK(Ac)STGGK(Ac)APRK(Ac)QL-K(Biot)-NH <sub>2</sub>                               |
| 166 | ARTK(Me <sub>3</sub> )QpTARK(Ac)STGGK(Ac)APRK(Ac)QL-K(Biot)-NH <sub>2</sub>             |
| 167 | ARTK(Me <sub>2</sub> )QpTARK(Ac)STGGK(Ac)APRK(Ac)QL-K(Biot)-NH <sub>2</sub>             |
|     | <b>H2A[1-17]</b>                                                                        |
| 300 | Ac-SGRGK <sup>5</sup> QGGK <sup>9</sup> ARAK <sup>13</sup> AK <sup>15</sup> TR-Peg-Biot |
| 301 | Ac-SGRGK(Ac)QGGK(Ac)ARAK(Ac)AK(Ac)TR-Peg-Biot                                           |
| 302 | Ac-SGRGK(Ac)QGGKARAKAKTR-Peg-Biot                                                       |
| 303 | Ac-pSGRGK(Ac)QGGKARAKAKTR-Peg-Biot                                                      |
| 304 | Ac-SGR(Me <sub>2</sub> a)GK(Ac)QGGKARAKAKTR-Peg-Biot                                    |
| 305 | Ac-pSGR(Me <sub>2</sub> a)GK(Ac)QGGKARAKAKTR-Peg-Biot                                   |
| 306 | Ac-SGCitGK(Ac)QGGKARAKAKTR-Peg-Biot                                                     |
| 307 | Ac-pSGCitGK(Ac)QGGKARAKAKTR-Peg-Biot                                                    |
| 308 | Ac-pSGRGK(Ac)QGGK(Ac)ARAK(Ac)AK(Ac)TR-Peg-Biot                                          |
| 309 | SGRGK(Ac)QGGK(Ac)ARAK(Ac)AK(Ac)TR-Peg-Biot                                              |
| 310 | pSGRGK(Ac)QGGK(Ac)ARAK(Ac)AK(Ac)TR-Peg-Biot                                             |
|     | <b>H2B[1-24]</b>                                                                        |
| 400 | PEPAKSAPAPKKGSKKAVTKAQKK-Peg-Biot                                                       |
| 401 | PEPAK(Me <sub>3</sub> )SAPAPKKGSKKAVTKAQKK-Peg-Biot                                     |
| 402 | PEPAK(Me <sub>2</sub> )SAPAPKKGSKKAVTKAQKK-Peg-Biot                                     |
| 403 | PEPAK(Me)SAPAPKKGSKKAVTKAQKK-Peg-Biot                                                   |

<sup>1</sup> Identifier numbers correspond to internal tracking numbers. Omitted numbers code for peptides not used in this study.

**Supplementary Table 3: Map of Peptide Location on Arrays – Listed by Identifying Number<sup>1</sup>**

| subarray 1 and 3 |                |                 |                 |                 |                 |                 |                 |
|------------------|----------------|-----------------|-----------------|-----------------|-----------------|-----------------|-----------------|
| IgG (A1-A6)      | 1 (A7-A12)     | IgG (A13-A18)   | 2 (A19-A24)     | IgG (A25-A30)   | 3 (A31-A36)     | IgG (A37-A42)   | 4 (A43-A48)     |
| F (B1-B6)        | 5 (B7-B12)     | 100 (B13-B18)   | 6 (B19-B24)     | 120 (B25-B30)   | 7 (B31-A36)     | 58 (B37-B42)    | 8 (B43-B48)     |
| 90 (C1-C6)       | 10 (C7-C12)    | F (C13-C18)     | 11 (C19-C24)    | 121 (C25-C30)   | 12 (C31-C36)    | 59 (C37-C42)    | 13 (C43-C48)    |
| 91 (D1-D6)       | 14 (D7-D12)    | 101 (D13-D18)   | 15 (D19-D24)    | F (D25-D30)     | 16 (D31-D36)    | 66 (D37-D42)    | 17 (D43-D48)    |
| 93 (E1-E6)       | 18 (E7-E12)    | 102 (E13-E18)   | 19 (E19-E24)    | 122 (E25-E30)   | 20 (E31-E36)    | F (E37-E42)     | 21 (E43-E48)    |
| 95 (F1-F6)       | 22 (F7-F12)    | 103 (F13-F18)   | 23 (F19-F24)    | 123 (F25-F30)   | 24 (F31-F36)    | 67 (F37-F42)    | 25 (F43-F48)    |
| 69 (G1-G6)       | 26 (G7-G12)    | 104 (G13-G18)   | 27 (G19-G24)    | 123 (G25-G30)   | 28 (G31-G36)    | 68 (G37-G42)    | 29 (G43-G48)    |
| 162 (H1-H6)      | 145 (H7-H12)   | 144 (H13-H18)   | 137 (H19-H24)   | 147 (H25-H30)   | 138 (H31-H36)   | 148 (H37-H42)   | 139 (H43-H48)   |
| blank (I1-I6)    | blank (I7-I12) | blank (I13-I18) | blank (I19-I24) | blank (I25-I30) | blank (I31-I36) | blank (I37-I42) | blank (I43-I48) |
| blank (J1-J6)    | blank (J7-J12) | blank (J13-J18) | blank (J19-J24) | blank (J25-J30) | blank (J31-J36) | blank (J37-J42) | blank (J43-J48) |
| blank (K1-K6)    | blank (K7-K12) | blank (K13-K18) | blank (K19-K24) | blank (K25-K30) | blank (K31-K36) | blank (K37-K42) | blank (K43-K48) |
| blank (L1-L6)    | blank (L7-L12) | blank (L13-L18) | blank (L19-L24) | blank (L25-L30) | blank (L31-L36) | blank (L37-L42) | blank (L43-L48) |
| IgG (M1-M6)      | 30 (M7-M12)    | IgG (M13-M18)   | 32 (M19-M24)    | IgG (M25-M30)   | 33 (M31-M36)    | IgG (M37-M42)   | 34 (M43-M48)    |
| 70 (N1-N6)       | 35 (N7-N12)    | 301 (N13-N18)   | 36 (N19-N24)    | 305 (N25-N30)   | 37 (N31-N36)    | F (N37-N42)     | 38 (N43-N48)    |
| 71 (O1-O6)       | 39 (O7-O12)    | 302 (O13-O18)   | 40 (O19-O24)    | F (O25-O30)     | 41 (O31-O36)    | 309 (O37-O42)   | 42 (O43-O48)    |
| 72 (P1-P6)       | 43 (P7-P12)    | F (P13-P18)     | 44 (P19-P24)    | 306 (P25-P30)   | 45 (P31-P36)    | 310 (P37-P42)   | 157 (P43-P48)   |
| F (Q1-Q6)        | 47 (Q7-Q12)    | 303 (Q13-Q18)   | 48 (Q19-Q24)    | 307 (Q25-Q30)   | 50 (Q31-Q36)    | 400 (Q37-Q42)   | 51 (Q43-Q48)    |
| 300 (R1-R6)      | 52 (R7-R12)    | 304 (R13-R18)   | 53 (R19-R24)    | 308 (R25-R30)   | 54 (R31-R36)    | 401 (R37-R42)   | 55 (R43-R48)    |
| 402 (S1-S6)      | IgG (S7-S12)   | 403 (S13-S18)   | 167 (S19-S24)   | 56 (S25-S30)    | IgG (S31-S36)   | F (S37-S42)     | IgG (S43-S48)   |
| 163 (T1-T6)      | 146 (T7-T12)   | 164 (T13-T18)   | 132 (T19-T24)   | 165 (T25-T30)   | 133 (T31-T36)   | 166 (T37-T42)   | 134 (T43-T48)   |
| blank (U1-U6)    | blank (U7-U12) | blank (U13-U18) | blank (U19-U24) | blank (U25-U30) | blank (U31-U36) | blank (U37-U42) | blank (U43-U48) |
| blank (V1-V6)    | blank (V7-V12) | blank (V13-V18) | blank (V19-V24) | blank (V25-V30) | blank (V31-V36) | blank (V37-V42) | blank (V43-V48) |
| blank (W1-W6)    | blank (W7-W12) | blank (W13-W18) | blank (W19-W24) | blank (W25-W30) | blank (W31-W36) | blank (W37-W42) | blank (W43-W48) |
| blank (X1-X6)    | blank (X7-X12) | blank (X13-X18) | blank (X19-X24) | blank (X25-X30) | blank (X31-X36) | blank (X37-X42) | blank (X43-X48) |
| subarray 2 and 4 |                |                 |                 |                 |                 |                 |                 |
| 134 (A1-A6)      | 166 (A7-A12)   | 133 (A13-A18)   | 165 (A19-A24)   | 132 (A25-A30)   | 164 (A31-A36)   | 146 (A37-A42)   | 163 (A43-A48)   |
| IgG (B1-B6)      | F (B7-B12)     | IgG (B13-B18)   | 56 (B19-B24)    | 167 (B25-B30)   | 403 (B31-A36)   | IgG (B37-B42)   | 402 (B43-B48)   |
| 55 (C1-C6)       | 401 (C7-C12)   | 54 (C13-C18)    | 308 (C19-C24)   | 53 (C25-C30)    | 304 (C31-C36)   | 52 (C37-C42)    | 300 (C43-C48)   |
| 51 (D1-D6)       | 400 (D7-D12)   | 50 (D13-D18)    | 307 (D19-D24)   | 48 (D25-D30)    | 303 (D31-D36)   | 47 (D37-D42)    | F (D43-D48)     |
| 157 (E1-E6)      | 310 (E7-E12)   | 45 (E13-E18)    | 306 (E19-E24)   | 44 (E25-E30)    | F (E31-E36)     | 43 (E37-E42)    | 72 (E43-E48)    |
| 42 (F1-F6)       | 309 (F7-F12)   | 41 (F13-F18)    | F (F19-F24)     | 40 (F25-F30)    | 302 (F31-F36)   | 39 (F37-F42)    | 71 (F43-F48)    |
| 38 (G1-G6)       | F (G7-G12)     | 37 (G13-G18)    | 305 (G19-G24)   | 36 (G25-G30)    | 301 (G31-G36)   | 35 (G37-G42)    | 70 (G43-G48)    |
| 34 (H1-H6)       | IgG (H7-H12)   | 33 (H13-H18)    | IgG (H19-H24)   | 32 (H25-H30)    | IgG (H31-H36)   | 30 (H37-H42)    | IgG (H43-H48)   |
| blank (I1-I6)    | blank (I7-I12) | blank (I13-I18) | blank (I19-I24) | blank (I25-I30) | blank (I31-I36) | blank (I37-I42) | blank (I43-I48) |
| blank (J1-J6)    | blank (J7-J12) | blank (J13-J18) | blank (J19-J24) | blank (J25-J30) | blank (J31-J36) | blank (J37-J42) | blank (J43-J48) |
| blank (K1-K6)    | blank (K7-K12) | blank (K13-K18) | blank (K19-K24) | blank (K25-K30) | blank (K31-K36) | blank (K37-K42) | blank (K43-K48) |
| blank (L1-L6)    | blank (L7-L12) | blank (L13-L18) | blank (L19-L24) | blank (L25-L30) | blank (L31-L36) | blank (L37-L42) | blank (L43-L48) |
| 139 (M1-M6)      | 148 (M7-M12)   | 138 (M13-M18)   | 147 (M19-M24)   | 137 (M25-M30)   | 144 (M31-M36)   | 145 (M37-M42)   | 162 (M43-M48)   |
| 29 (N1-N6)       | 68 (N7-N12)    | 28 (N13-N18)    | 124 (N19-N24)   | 27 (N25-N30)    | 104 (N31-N36)   | 26 (N37-N42)    | 69 (N43-N48)    |
| 25 (O1-O6)       | 67 (O7-O12)    | 24 (O13-O18)    | 123 (O19-O24)   | 23 (O25-O30)    | 103 (O31-O36)   | 22 (O37-O42)    | 95 (O43-O48)    |
| 21 (P1-P6)       | F (P7-P12)     | 20 (P13-P18)    | 122 (P19-P24)   | 19 (P25-P30)    | 102 (P31-P36)   | 18 (P37-P42)    | 93 (P43-P48)    |
| 17 (Q1-Q6)       | 66 (Q7-Q12)    | 16 (Q13-Q18)    | F (Q19-Q24)     | 15 (Q25-Q30)    | 101 (Q31-Q36)   | 14 (Q37-Q42)    | 91 (Q43-Q48)    |
| 13               | 59             | 12              | 121             | 11              | F               | 10              | 90              |

|                  |                   |                    |                    |                    |                    |                    |                    |
|------------------|-------------------|--------------------|--------------------|--------------------|--------------------|--------------------|--------------------|
| (R1-R6)          | (R7-R12)          | (R13-R18)          | (R19-R24)          | (R25-R30)          | (R31-R36)          | (R37-R42)          | (R43-R48)          |
| 8<br>(S1-S6)     | 58<br>(S7-S12)    | 7<br>(S13-S18)     | 120<br>(S19-S24)   | 6<br>(S25-S30)     | 100<br>(S31-S36)   | 5<br>(S37-S42)     | F<br>(S43-S48)     |
| 4<br>(T1-T6)     | IgG<br>(T7-T12)   | 3<br>(T13-T18)     | IgG<br>(T19-T24)   | 2<br>(T25-T30)     | IgG<br>(T31-T36)   | 1<br>(T37-T42)     | IgG<br>(T43-T48)   |
| blank<br>(U1-U6) | blank<br>(U7-U12) | blank<br>(U13-U18) | blank<br>(U19-U24) | blank<br>(U25-U30) | blank<br>(U31-U36) | blank<br>(U37-U42) | blank<br>(U43-U48) |
| blank<br>(V1-V6) | blank<br>(V7-V12) | blank<br>(V13-V18) | blank<br>(V19-V24) | blank<br>(V25-V30) | blank<br>(V31-V36) | blank<br>(V37-V42) | blank<br>(V43-V48) |
| blank<br>(W1-W6) | blank<br>(W7-W12) | blank<br>(W13-W18) | blank<br>(W19-W24) | blank<br>(W25-W30) | blank<br>(W31-W36) | blank<br>(W37-W42) | blank<br>(W43-W48) |
| blank<br>(X1-X6) | blank<br>(X7-X12) | blank<br>(X13-X18) | blank<br>(X19-X24) | blank<br>(X25-X30) | blank<br>(X31-X36) | blank<br>(X37-X42) | blank<br>(X43-X48) |

<sup>1</sup> Each peptide was printed as a series of 6 sequential spots on each of four subarrays. The layout of subarrays 1 and 3, and 2 and 4 are identical. Parentheses denote the location within a subarray where a given peptide was printed.

**Supplementary Table 4: Reaction Conditions for All Antibodies Tested**

| <b>Barcode</b> | <b>Antibody</b>        | <b>Dilution</b> |
|----------------|------------------------|-----------------|
| 343501         | H3K79me3 abcam new lot | 1:1000          |
| 343502         | H3K4me1 upstate        | 1:1000          |
| 343503         | H4 tetraacetyl         | 1:2000          |
| 343504         | H3K79me2               | 1:1000          |
| 343505         | H3K79me1               | 1:1000          |
| 343506         | H3K4me2                | 1:5000          |
| 343507         | H3K14Ac millipore      | 1:5000          |
| 343508         | H3S10phos              | 1:5000          |
| 343509         | H3K79me3 old lot       | 1:3000          |
| 343510         | H3K79me2               | 1:1000          |
| 343511         | H3K4me3 active motif   | 1:1000          |
| 343512         | H3K14Ac abcam          | 1:1000          |
| 343513         | H3K14Ac active motif   | 1:1000          |
| 343514         | H3K14Ac active motif   | 1:1000          |
| 343515         | H3K14Ac millipore      | 1:5000          |
| 343516         | H3K4me3 active motif   | 1:1000          |
| 343517         | H3K4me3 millipore      | 1:10000         |
| 343518         | H3K4me3 abcam          | 2.5µg/mL        |
| 343520         | H3K4me2                | 1:5000          |
| 343521         | H3K14Ac abcam          | 1:1000          |
| 343522         | H3K79me1               | 1:1000          |
| 343523         | H3k79me3 new           | 1:3000          |
| 343524         | H3K4me3 Millipore      | 1:10000         |
| 343525         | H3K9acS10phos          | 1:1000          |
| 343544         | H4 tetraacetyl         | 1:2000          |
| 343545         | H3K79me3               | 1:1000          |
| 343546         | H3K4me1 upstate        | 1:1000          |
| 343547         | H3K4me3 abcam          | 2.5µg/mL        |
| 343548         | H3S10phos              | 1:5000          |
| 343549         | H3K4me1 millipore      | 1:1000          |
| 343550         | H3K9acS10phos          | 1:1000          |
| 343602         | H3K79me3 old lot       | 1:3000          |
| 343604         | H3K4me1 millipore      | 1:1000          |
| 343606         | H3S10phos              | 1:5000          |
| 343614         | H3k79me3 abcam new lot | 1:3000          |
